# Supplementary material for: Nighttime atmospheric chemistry of iodine
Source: Copernicus journal article supplement (doi:10.5194/acp-16-15593-2016), 2016-12-19
Supplement: Supplementary file 1 [file acp-16-15593-2016-supplement.pdf]

Supplement of Atmos. Chem. Phys., 16, 15593–15604, 2016  
<http://www.atmos-chem-phys.net/16/15593/2016/>  
doi:10.5194/acp-16-15593-2016-supplement  
© Author(s) 2016. CC Attribution 3.0 License.

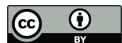

*Supplement of*

## **Nighttime atmospheric chemistry of iodine**

**Alfonso Saiz-Lopez et al.**

*Correspondence to:* Alfonso Saiz-Lopez (a.saiz@csic.es)

The copyright of individual parts of the supplement might differ from the CC-BY 3.0 licence.

Table 1. Iodine chemistry scheme in CAM-Chem: Bimolecular, thermal decomposition and termolecular reactions.

| Reaction                                                               | $k / \text{cm}^3 \text{ molecule}^{-1} \text{ s}^{-1}$               | Notes                |
|------------------------------------------------------------------------|----------------------------------------------------------------------|----------------------|
| $\text{I} + \text{O}_3 \rightarrow \text{IO} + \text{O}_2$             | $2.1 \times 10^{-11} e^{(-830/T)}$                                   | 1                    |
| $\text{IO} + \text{O}_3 \rightarrow \text{OIO} + \text{O}_2$           | $3.6 \times 10^{-16}$                                                | 2                    |
| $\text{I} + \text{HO}_2 \rightarrow \text{HI} + \text{O}_2$            | $1.5 \times 10^{-11} e^{(-1090/T)}$                                  | 3                    |
| $\text{IO} + \text{NO} \rightarrow \text{I} + \text{NO}_2$             | $7.15 \times 10^{-12} e^{(300/T)}$                                   | 1                    |
| $\text{IO} + \text{HO}_2 \rightarrow \text{HOI} + \text{O}_2$          | $1.4 \times 10^{-11} e^{(540/T)}$                                    | 1                    |
| $\text{IO} + \text{IO} \rightarrow \text{OIO} + \text{I}$              | $2.13 \times 10^{-11} e^{(180/T)} \times [1 + e^{(-p/191.42)}]$      | 1, 4                 |
| $\text{IO} + \text{IO} \rightarrow \text{I}_2\text{O}_2$               | $3.27 \times 10^{-11} e^{(180/T)} \times [1 - 0.65 e^{(-p/191.42)}]$ | 1, 4                 |
| $\text{IO} + \text{OIO} \rightarrow \text{I}_2\text{O}_3$              | $w_1 \cdot \exp(w_2 \cdot T)^a$                                      | 4, 5, 6 <sup>g</sup> |
| $\text{OIO} + \text{OIO} \rightarrow \text{I}_2\text{O}_4$             | $w_1 \cdot \exp(w_2 \cdot T)^b$                                      | 4, 5, 6 <sup>g</sup> |
| $\text{I}_2 + \text{O} \rightarrow \text{IO} + \text{I}$               | $1.25 \times 10^{-10}$                                               | 1                    |
| $\text{IO} + \text{O} \rightarrow \text{I} + \text{O}_2$               | $1.4 \times 10^{-10}$                                                | 1                    |
| $\text{IO} + \text{OH} \rightarrow \text{HO}_2 + \text{I}$             | $1.0 \times 10^{-10}$                                                | 7                    |
| $\text{I}_2\text{O}_2 \rightarrow \text{OIO} + \text{I}$               | $w_1 \cdot \exp(w_2/T)^c$                                            | 5, 6, 8 <sup>g</sup> |
| $\text{I}_2\text{O}_2 \rightarrow \text{IO} + \text{IO}$               | $w_1 \cdot \exp(w_2/T)^d$                                            | 5, 6, 8 <sup>g</sup> |
| $\text{I}_2\text{O}_4 \rightarrow 2 \text{OIO}$                        | $w_1 \cdot \exp(w_2/T)^e$                                            | 5, 8 <sup>g</sup>    |
| $\text{I}_2 + \text{OH} \rightarrow \text{HOI} + \text{I}$             | $1.8 \times 10^{-10}$                                                | 3                    |
| $\text{I}_2 + \text{NO}_3 \rightarrow \text{I} + \text{IONO}_2$        | $1.5 \times 10^{-12}$                                                | 9                    |
| $\text{I} + \text{NO}_3 \rightarrow \text{IO} + \text{NO}_2$           | $1.0 \times 10^{-10}$                                                | 1                    |
| $\text{OH} + \text{HI} \rightarrow \text{I} + \text{H}_2\text{O}$      | $1.6 \times 10^{-11} e^{(440/T)}$                                    | 1                    |
| $\text{I} + \text{IONO}_2 \rightarrow \text{I}_2 + \text{NO}_3$        | $9.1 \times 10^{-11} e^{(-146/T)}$                                   | 5                    |
| $\text{HOI} + \text{OH} \rightarrow \text{IO} + \text{H}_2\text{O}$    | $2.0 \times 10^{-13}$                                                | 10                   |
| $\text{IO} + \text{DMS} \rightarrow \text{DMSO} + \text{I}$            | $3.2 \times 10^{-13} e^{(-925/T)}$                                   | 11                   |
| $\text{INO}_2 \rightarrow \text{I} + \text{NO}_2$                      | $1008 \times 10^{15} e^{(-13670/T)}$                                 | 12, 13, 14           |
| $\text{IONO}_2 \rightarrow \text{IO} + \text{NO}_2$                    | $w_1 \cdot \exp(w_2/T)^f$                                            | 5, 15                |
| $\text{INO} + \text{INO} \rightarrow \text{I}_2 + 2\text{NO}$          | $8.4 \times 10^{-11} e^{(-2620/T)}$                                  | 3                    |
| $\text{INO}_2 + \text{INO}_2 \rightarrow \text{I}_2 + 2\text{NO}_2$    | $4.7 \times 10^{-13} e^{(-1670/T)}$                                  | 1                    |
| $\text{OIO} + \text{NO} \rightarrow \text{IO} + \text{NO}_2$           | $1.1 \times 10^{-12} e^{(542/T)}$                                    | 14                   |
| $\text{HI} + \text{NO}_3 \rightarrow \text{I} + \text{HNO}_3$          | $1.3 \times 10^{-12} e^{(-1830/T)}$                                  | 16                   |
| $\text{IO} + \text{BrO} \rightarrow \text{Br} + \text{I} + \text{O}_2$ | $0.30 \times 10^{-11} e^{(510/T)}$                                   | 1                    |
| $\text{IO} + \text{BrO} \rightarrow \text{Br} + \text{OIO}$            | $1.20 \times 10^{-11} e^{(510/T)}$                                   | 1                    |
| $\text{I} + \text{BrO} \rightarrow \text{IO} + \text{Br}$              | $1.44 \times 10^{-11}$                                               | 17, 18, 19           |

|                                                                               |                                                                                                                   |                 |
|-------------------------------------------------------------------------------|-------------------------------------------------------------------------------------------------------------------|-----------------|
| IO + ClO → I + OCIO                                                           | $2.585 \times 10^{-12} e^{(280/T)}$                                                                               | 1               |
| IO + ClO → I + Cl + O <sub>2</sub>                                            | $1.175 \times 10^{-12} e^{(280/T)}$                                                                               | 1               |
| IO + ClO → ICl + O <sub>2</sub>                                               | $0.940 \times 10^{-12} e^{(280/T)}$                                                                               | 1               |
| IO + Br → I + BrO                                                             | $2.49 \times 10^{-11}$                                                                                            | 18, 19          |
| IO + NO <sub>3</sub> → OIO + NO <sub>2</sub>                                  | $9.0 \times 10^{-12}$                                                                                             | 20              |
| IO + CH <sub>3</sub> O <sub>2</sub> → CH <sub>2</sub> O + I + HO <sub>2</sub> | $2.0 \times 10^{-12}$                                                                                             | 2 <sup>h</sup>  |
| CH <sub>3</sub> I + OH → I + H <sub>2</sub> O + HO <sub>2</sub>               | $2.90 \times 10^{-12} e^{(-1100/T)}$                                                                              | 3               |
| I + NO <sub>2</sub> (+ M) → INO <sub>2</sub> (+ M)                            | $k_0 = 3 \times 10^{-31} \times (T / 300)^{-1}$<br>$k_\infty = 6.6 \times 10^{-11}$                               | 3 <sup>i</sup>  |
| IO + NO <sub>2</sub> (+ M) → IONO <sub>2</sub> (+ M)                          | $k_0 = 6.5 \times 10^{-31} \times (T / 300)^{-3.5}$<br>$k_\infty = 7.6 \times 10^{-12} \times (T / 300)^{-1.5}$   | 3 <sup>i</sup>  |
| I + NO (+ M) → INO (+ M)                                                      | $k_0 = 1.8 \times 10^{-32} \times (T / 300)^{-1}$<br>$k_\infty = 1.7 \times 10^{-11}$                             | 3 <sup>i</sup>  |
| OIO + OH (+ M) → HOIO <sub>2</sub> (+ M)                                      | $k_0 = 1.5 \times 10^{-27} \times (T / 300)^{-3.93}$<br>$k_\infty = 7.76 \times 10^{-10} \times (T / 300)^{-0.8}$ | 14 <sup>j</sup> |
| HOI + NO <sub>3</sub> → IO + HNO <sub>3</sub>                                 | $2.7 \times 10^{-12} (300/T)^{2.66}$                                                                              | 21              |

<sup>1</sup> IUPAC-2008 (Atkinson et al., 2007) ; <sup>2</sup>(Dillon et al., 2006b); <sup>3</sup> JPL-2010 (Sander et al., 2011); <sup>4</sup>(Gómez Martín et al., 2007); <sup>5</sup>(Kaltsoyannis and Plane, 2008); <sup>6</sup>(Galvez et al., 2013); <sup>7</sup>(Bösch et al., 2003); <sup>8</sup> (Gómez Martín and Plane, 2009); <sup>9</sup>(Chambers et al., 1992); <sup>10</sup>(Chameides and Davis, 1980); <sup>11</sup>(Dillon et al., 2006a); <sup>12</sup>(McFiggans et al., 2000); <sup>13</sup>(Jenkin et al., 1985); <sup>14</sup>(Plane et al., 2006); <sup>15</sup>(Allan and Plane, 2002); <sup>16</sup>(Lancar et al., 1991); <sup>17</sup>(Laszlo et al., 1997); <sup>18</sup>(Bedjanian et al., 1997); <sup>19</sup>(Gilles et al., 1997); <sup>20</sup>(Dillon et al., 2008); <sup>21</sup>This work.

$$a \quad w1 = 4.687 \times 10^{-10} - 1.3855 \times 10^{-5} \times e^{(-0.75 \text{ p} / 1.62265)} + 5.51868 \times 10^{-10} \times e^{(-0.75 \text{ p} / 199.328)}$$

$$w2 = -0.00331 - 0.00514 \times e^{(-0.75 \text{ p} / 325.68711)} - 0.00444 \times e^{(-0.75 \text{ p} / 40.81609)}$$

$$b \quad w1 = 1.1659 \times 10^{-9} - 7.79644 \times 10^{-10} \times e^{(-0.75 \text{ p} / 22.09281)} + 1.03779 \times 10^{-9} \times e^{(-0.75 \text{ p} / 568.15381)}$$

$$w2 = -0.00813 - 0.00382 \times e^{(-0.75 \text{ p} / 45.57591)} - 0.00643 \times e^{(-0.75 \text{ p} / 417.95061)}$$

$$c \quad w1 = 3.54288 \times 10^{10} + 1.8523 \times 10^{11} \times 0.75 \text{ p} - 1.45435 \times 10^8 \times (0.75 \text{ p})^2 + 60799.4344 \times (0.75 \text{ p})^3$$

$$w2 = -9681.65989 + 346.95538 \times e^{(-0.75 \text{ p} / 343.25322)} + 251.78032 \times e^{(-0.75 \text{ p} / 44.1466)}$$

$$d \quad w1 = 255335000000 - 4418880000 \times 0.75 \text{ p} + 85618600 \times (0.75 \text{ p})^2 + 14218.81 \times (0.75 \text{ p})^3$$

$$w2 = -11466.82304 + 597.01334 \times e^{(-0.75 \text{ p} / 1382.62325)} - 167.3391 \times e^{(-0.75 \text{ p} / 43.75089)}$$

$$e \quad w1 = -1.92626 \times 10^{14} + 4.67414 \times 10^{13} \times 0.75 \text{ p} - 3.68651 \times 10^8 \times (0.75 \text{ p})^2 - 3.09109 \times 10^6 \times (0.75 \text{ p})^3$$

$$w2 = -12302.15294 + 252.78367 \times e^{(-0.75 \text{ p} / 46.12733)} + 437.62868 \times e^{(-0.75 \text{ p} / 428.4413)}$$

$$\begin{aligned}
 {}^f \quad w_1 &= -2.63544 \times 10^{13} + 4.32845 \times 10^{12} \times (0.75 \text{ p}) + 3.73758 \times 10^8 \times (0.75 \text{ p})^2 - \\
 &628468.76313 \times (0.75 \text{ p})^3 \\
 w_2 &= -13847.85015 + 240.34465 \times e^{(-0.75 \text{ p} / 49.27141)} + 451.35864 \times e^{(-0.75 \text{ p} / \\
 &436.87605)}
 \end{aligned}$$

<sup>g</sup> The empirical expressions of the form  $w_1 \cdot \exp(w_2 \cdot T)$  were obtained by non-linear least squares fitting of *Rice–Ramsperger–Kassel–Marcus* (RRKM) theoretical results for the indicated reaction rate constants and thermal dissociation rates in the (27 – 1013) hPa pressure range. RRKM calculations were carried out using the MESMER algorithm (Glowacki et al., 2012) as indicated in the corresponding references (e.g. (Galvez et al., 2013)). Expression <sup>a</sup> produces negative values outside the range of modelled rate constants ( $p < 20$  hPa), and therefore a fixed rate constant of  $3 \times 10^{-11} \text{ cm}^3 \text{ molecule}^{-1} \text{ s}^{-1}$  was assumed. Expressions <sup>e</sup> and <sup>f</sup> generate negligible dissociation rates below  $\sim 500$  hPa which become negative at  $\sim 8$  hPa – in this case they are set to zero below that pressure.

<sup>h</sup> Updated heats of formation for IO, OIO, and  $\text{CH}_3\text{O}_2$  (Dooley et al., 2008; Gómez Martín and Plane, 2009; Knyazev and Slagle, 1998) show that the only accessible exothermic product channel of  $\text{CH}_3\text{O}_2 + \text{IO}$  (Drougas and Kosmas, 2007) is  $\text{CH}_2\text{O} + \text{I} + \text{O}_2$  ( $\Delta H_r = -5 \pm 6 \text{ kJ mol}^{-1}$ ), consistent with the high yield of I and low yield of OIO found experimentally (Bale et al., 2005; Enami et al., 2006). Sensitivity studies have been carried out (Saiz-Lopez et al., 2014) using the preferred rate constant for this reaction of  $2 \times 10^{-12} \text{ cm}^3 \text{ molecule}^{-1} \text{ s}^{-1}$  (Dillon et al., 2006b), resulting in an enhancement of the ozone loss of 0.5% in the MBL and of less than 0.1% integrated throughout the troposphere in the  $J_{\text{I}_x\text{O}_y}$  scenario, and similarly negligible enhancements in the Base scenario. Impacts in the  $I_y$  partitioning are also very minor.

<sup>i</sup> The temperature and pressure dependent rate constant ( $k$ ) is computed based on the low pressure ( $k_0$ ) and the high-pressure ( $k_\infty$ ) rate coefficients following JPL-2010 (Sander et al., 2011).

<sup>j</sup> The Fast rate constants and a thermally stable product  $\text{HOIO}_2$  have been predicted theoretically (Plane et al., 2006), but no experimental studies reporting observation of  $\text{HOIO}_2$  and its photochemical properties in the gas phase are available. Since the level of uncertainty is even larger than for the  $\text{I}_x\text{O}_y$ , it has not been included in the mechanism.

Table 2. Iodine chemistry scheme in CAM-Chem: Photochemical reactions.

| Reaction                                                                  |
|---------------------------------------------------------------------------|
| $\text{CH}_3\text{I} + h\nu \rightarrow \text{CH}_3\text{O}_2 + \text{I}$ |
| $\text{CH}_2\text{I}_2 + h\nu \rightarrow 2\text{I}^a$                    |
| $\text{CH}_2\text{IBr} + h\nu \rightarrow \text{Br} + \text{I}^a$         |
| $\text{CH}_2\text{ICl} + h\nu \rightarrow \text{Cl} + \text{I}^a$         |
| $\text{I}_2 + h\nu \rightarrow 2\text{I}$                                 |
| $\text{IO} + h\nu \rightarrow \text{I} + \text{O}$                        |
| $\text{OIO} + h\nu \rightarrow \text{I} + \text{O}_2$                     |
| $\text{INO} + h\nu \rightarrow \text{I} + \text{NO}$                      |
| $\text{INO}_2 + h\nu \rightarrow \text{I} + \text{NO}_2^b$                |
| $\text{IONO}_2 + h\nu \rightarrow \text{I} + \text{NO}_3$                 |
| $\text{HOI} + h\nu \rightarrow \text{I} + \text{OH}$                      |
| $\text{IBr} + h\nu \rightarrow \text{I} + \text{Br}$                      |
| $\text{ICl} + h\nu \rightarrow \text{I} + \text{Cl}$                      |
| $\text{I}_2\text{O}_2 + h\nu \rightarrow \text{I} + \text{OIO}^c$         |
| $\text{I}_2\text{O}_3 + h\nu \rightarrow \text{IO} + \text{OIO}^c$        |
| $\text{I}_2\text{O}_4 + h\nu \rightarrow \text{OIO} + \text{OIO}^c$       |

Photolysis rates are computed online considering the actinic flux calculation in CAM-Chem. The absorption cross-sections and quantum yields for all species besides the  $\text{I}_x\text{O}_y$  have been taken from IUPAC-2008 (Atkinson et al., 2007; Atkinson et al., 2008) and JPL-2010 (Sander et al., 2011).

<sup>a</sup> radical organic products are not considered.

<sup>b</sup> only the reaction channel reported in JPL 06-02 (Sander et al., 2006) is considered.

<sup>c</sup> photolysis reactions only considered in the  $J_{\text{I}x\text{O}y}$  scheme (Saiz-Lopez et al., 2014).

Table 3. Iodine chemistry scheme in CAM-Chem: Heterogeneous reactions.

| <b>Sea-salt aerosol reactions</b>                             | <b>Reactive uptake</b> |
|---------------------------------------------------------------|------------------------|
| $\text{IONO}_2 \rightarrow 0.5 \text{ IBr} + 0.5 \text{ ICl}$ | $\gamma = 0.01$        |
| $\text{INO}_2 \rightarrow 0.5 \text{ IBr} + 0.5 \text{ ICl}$  | $\gamma = 0.02$        |
| $\text{HOI} \rightarrow 0.5 \text{ IBr} + 0.5 \text{ ICl}$    | $\gamma = 0.06$        |
| $\text{I}_2\text{O}_2 \rightarrow$                            | $\gamma = 0.01^{\S}$   |
| $\text{I}_2\text{O}_3 \rightarrow$                            | $\gamma = 0.01^{\S}$   |
| $\text{I}_2\text{O}_4 \rightarrow$                            | $\gamma = 0.01^{\S}$   |

Values based on the THAMO model (Saiz-Lopez et al., 2008) and implemented in CAM-Chem following (Ordóñez et al., 2012).

<sup>§</sup> Deposition of  $\text{I}_x\text{O}_y$  species on sea-salt aerosols has been included following the free regime approximation.

Table 4. Iodine chemistry scheme in CAM-Chem: Henry's Law constants and dry deposition velocities.

| Species                          | $k_0$ (M atm <sup>-1</sup> )        | Deposition velocity <sup>§</sup> (cm s <sup>-1</sup> ) | Reference      |
|----------------------------------|-------------------------------------|--------------------------------------------------------|----------------|
| IBr <sup>ice</sup>               | $2.4 \times 10^1$                   | –                                                      | 1              |
| ICl <sup>ice</sup>               | $1.1 \times 10^2$                   | –                                                      | 1              |
| HI                               | $7.8 \times 10^{-1}$                | 1.0                                                    | 1 <sup>a</sup> |
| HOI – ( $J_{IxOy} / Base$ )      | $1.9 \times 10^3 / 4.5 \times 10^3$ | 0.75                                                   | 1 <sup>b</sup> |
| IONO <sub>2</sub> <sup>ice</sup> | $1.0 \times 10^6$                   | 0.75                                                   | 2 <sup>c</sup> |
| INO <sub>2</sub> <sup>ice</sup>  | $3.0 \times 10^{-1}$                | 0.75                                                   | 1 <sup>d</sup> |
| IO                               | $4.5 \times 10^2$                   | –                                                      | 2              |
| OIO                              | $1.0 \times 10^4$                   | –                                                      | 2              |
| I <sub>2</sub> O <sub>2</sub>    | $1.0 \times 10^4$                   | 1.0                                                    | 2              |
| I <sub>2</sub> O <sub>3</sub>    | $1.0 \times 10^4$                   | 1.0                                                    | 2              |
| I <sub>2</sub> O <sub>4</sub>    | $1.0 \times 10^4$                   | 1.0                                                    | 2              |

<sup>§</sup> Dry deposition velocities are based on the THAMO model (Saiz-Lopez et al., 2008).

<sup>1</sup> Values reported in (Sander, 1999).

<sup>2</sup> Values based on the THAMO model (Saiz-Lopez et al., 2008).

<sup>a</sup> Considering a dissociation constant  $K_a = 3.2 \times 10^9$  and a temperature dependent coefficient  $c = 9800$  K

<sup>b</sup> Within the range of values given in the corresponding reference.

<sup>c</sup> Virtually infinite solubility is represented by using a very large arbitrary number.

<sup>d</sup> Value assumed to be equal to those of BrNO<sub>2</sub>.

<sup>ice</sup> Species for which ice-uptake is considered following (Neu and Prather, 2012).

## References

Allan, B. J., and Plane, J. M. C.: A Study of the Recombination of IO with NO<sub>2</sub> and the Stability of INO<sub>3</sub>: Implications for the Atmospheric Chemistry of Iodine, *J. Phys. Chem. A*, 106, 8634-8641, 2002.

Atkinson, R., Baulch, D. L., Cox, R. A., Crowley, J. N., Hampson, R. F., Hynes, R. G., Jenkin, M. E., Rossi, M. J., and Troe, J.: Evaluated kinetic and photochemical data for atmospheric chemistry: Volume III: gas phase reactions of inorganic halogens, *Atmos. Chem. Phys.*, 7, 981-1191, 2007.

Atkinson, R., Baulch, D. L., Cox, R. A., Crowley, J. N., Hampson, R. F., Hynes, R. G., Jenkin, M. E., Rossi, M. J., Troe, J., and Wallington, T. J.: Evaluated kinetic and photochemical data for atmospheric chemistry: Volume IV – gas phase reactions of organic halogen species, *Atmos. Chem. Phys.*, 8, 4141-4496, 10.5194/acp-8-4141-2008, 2008.

- Bale, C. S. E., Canosa-Mas, C. E., Shallcross, D. E., and Wayne, R. P.: A discharge-flow study of the kinetics of the reactions of IO with CH<sub>3</sub>O<sub>2</sub> and CF<sub>3</sub>O<sub>2</sub>, *Phys. Chem. Chem. Phys.*, 7, 2164-2172, 2005.
- Bedjanian, Y., Le Bras, G., and Poulet, G.: Kinetic study of the Br + IO, I + BrO and Br + I<sub>2</sub> reactions. Heat of formation of the BrO radical, *Chem. Phys. Lett.*, 266, 233-238, doi: 10.1016/S0009-2614(97)01530-3, 1997.
- Bösch, H., Camy-Peyret, C., Chipperfield, M. P., Fitzenberger, R., Harder, H., Platt, U., and Pfeilsticker, K.: Upper limits of stratospheric IO and OIO inferred from center-to-limb-darkening-corrected balloon-borne solar occultation visible spectra: Implications for total gaseous iodine and stratospheric ozone, *J. Geophys. Res.*, 108, 4455, 2003.
- Chambers, R. M., Heard, A. C., and Wayne, R. P.: Inorganic gas-phase reactions of the nitrate radical: iodine + nitrate radical and iodine atom + nitrate radical, *J. Phys. Chem.*, 96, 3321-3331, 10.1021/j100187a028, 1992.
- Chameides, W. L., and Davis, D.: Iodine: Its Possible Role in Tropospheric Photochemistry, *J. Geophys. Res.*, 85, 7383-7398, 1980.
- Dillon, T. J., Karunanandan, R., and Crowley, J. N.: The reaction of IO with CH<sub>3</sub>SCH<sub>3</sub>: products and temperature dependent rate coefficients by laser induced fluorescence, *Phys. Chem. Chem. Phys.*, 8, 847-855, 2006a.
- Dillon, T. J., Tucceri, M. E., and Crowley, J. N.: Laser induced fluorescence studies of iodine oxide chemistry Part II. The reactions of IO with CH<sub>3</sub>O<sub>2</sub>, CF<sub>3</sub>O<sub>2</sub> and O<sub>3</sub>., *Phys. Chem. Chem. Phys.*, 8, 5185-5198, 2006b.
- Dillon, T. J., Tucceri, M. E., Sander, R., and Crowley, J. N.: LIF studies of iodine oxide chemistry Part 3. Reactions IO + NO<sub>3</sub> -> OIO + NO<sub>2</sub>, I + NO<sub>3</sub> -> IO + NO<sub>2</sub>, and CH<sub>2</sub>I + O<sub>2</sub> -> (products): implications for the chemistry of the marine atmosphere at night., *Phys. Chem. Chem. Phys.*, 10, 1540-1554, 2008.
- Dooley, K. S., Geidosch, J. N., and North, S. W.: Ion imaging study of IO radical photodissociation: Accurate bond dissociation energy determination, *Chem. Phys. Lett.*, 457, 303-306, 2008.
- Drougas, E., and Kosmas, A. M.: Ab Initio Characterization of (CH<sub>3</sub>IO<sub>3</sub>) Isomers and the CH<sub>3</sub>O<sub>2</sub> + IO Reaction Pathways, *J. Phys. Chem. A*, 111, 3402-3408, 2007.
- Enami, S., Yamanaka, T., Hashimoto, S., Kawasaki, M., Nakano, Y., and Ishiwata, T.: Kinetic Study of IO Radical with RO<sub>2</sub> (R = CH<sub>3</sub>, C<sub>2</sub>H<sub>5</sub>, and CF<sub>3</sub>) Using Cavity Ring-Down Spectroscopy, *J. Phys. Chem. A*, 110, 9861-9866, 2006.
- Galvez, O., Gomez Martin, J. C., Gomez, P. C., Saiz-Lopez, A., and Pacios, L. F.: A theoretical study on the formation of iodine oxide aggregates and monohydrates, *Phys. Chem. Chem. Phys.*, 15, 15572-15583, 10.1039/C3CP51219C, 2013.
- Gilles, M. K., Turnipseed, A. A., Burkholder, J. B., and Ravishankara, A. R.: A study of the Br + IO → I + BrO and the reverse reaction, *Chem. Phys. Lett.*, 272, 75-82, doi: 10.1016/S0009-2614(97)00485-5, 1997.
- Glowacki, D. R., Liang, C.-H., Morley, C., Pilling, M. J., and Robertson, S. H.: MESMER: An Open-Source Master Equation Solver for Multi-Energy Well Reactions, *J. Phys. Chem. A*, 116, 9545-9560, 10.1021/jp3051033, 2012.
- Gómez Martín, J. C., Spietz, P., and Burrows, J. P.: Kinetic and Mechanistic Studies of the I<sub>2</sub>/O<sub>3</sub> Photochemistry, *J. Phys. Chem. A*, 111, 306-320, 2007.



Gómez Martín, J. C., and Plane, J. M. C.: Determination of the O-IO bond dissociation energy by photofragment excitation spectroscopy, *Chem. Phys. Lett.*, 474, 79-83, 2009.

Jenkin, M. E., Cox, R. A., and Candeland, D. E.: Photochemical Aspects of Tropospheric Iodine Behavior, *J. Atmos. Chem.*, 2, 359-375, 1985.

Kaltsoyannis, N., and Plane, J. M. C.: Quantum chemical calculations on a selection of iodine-containing species (IO, OIO,  $\text{INO}_3$ ,  $(\text{IO})_2$ ,  $\text{I}_2\text{O}_3$ ,  $\text{I}_2\text{O}_4$  and  $\text{I}_2\text{O}_5$ ) of importance in the atmosphere., *Phys. Chem. Chem. Phys.*, 10, 1723-1733, 2008.

Knyazev, V. D., and Slagle, I. R.: Thermochemistry of the R-O2 Bond in Alkyl and Chloroalkyl Peroxy Radicals, *J. Phys. Chem. A*, 102, 1770-1778, 10.1021/jp9726091, 1998.

Lancar, I. T., Mellouki, A., and Poulet, G.: Kinetics of the reactions of hydrogen iodide with hydroxyl and nitrate radicals, *Chem. Phys. Lett.*, 177, 554-558, 1991.

Laszlo, B., Huie, R. E., Kurylo, M. J., and Miziolek, A. W.: Kinetic studies of the reactions of BrO and IO radicals, *J. Geophys. Res.*, 102, 1997.

McFiggans, G., Plane, J. M. C., Allan, B. J., Carpenter, L. J., Coe, H., and O'Dowd, C.: A modeling study of iodine chemistry in the marine boundary layer, *J. Geophys. Res.*, [Atmos.], 105, 14371-14385, 2000.

Neu, J. L., and Prather, M. J.: Toward a more physical representation of precipitation scavenging in global chemistry models: cloud overlap and ice physics and their impact on tropospheric ozone, *Atmos. Chem. Phys.*, 12, 3289-3310, 10.5194/acp-12-3289-2012, 2012.

Ordóñez, C., Lamarque, J. F., Tilmes, S., Kinnison, D. E., Atlas, E. L., Blake, D. R., Sousa Santos, G., Brasseur, G., and Saiz-Lopez, A.: Bromine and iodine chemistry in a global chemistry-climate model: description and evaluation of very short-lived oceanic sources, *Atmos. Chem. Phys.*, 12, 1423-1447, 10.5194/acp-12-1423-2012, 2012.

Plane, J. M. C., Joseph, D. M., Allan, B. J., Ashworth, S. H., and Francisco, J. S.: An Experimental and Theoretical Study of the Reactions  $\text{OIO} + \text{NO}$  and  $\text{OIO} + \text{OH}$ , *J. Phys. Chem. A*, 110, 93-100, 2006.

Saiz-Lopez, A., Plane, J. M. C., Mahajan, A. S., Anderson, P. S., Bauguitte, S. J.-B., Jones, A. E., Roscoe, H. K., Salmon, R. A., Bloss, W. J., Lee, J. D., and Heard, D. E.: On the vertical distribution of boundary layer halogens over coastal Antarctica: implications for  $\text{O}_3$ ,  $\text{HO}_x$ ,  $\text{NO}_x$  and the Hg lifetime, *Atmos. Chem. Phys.*, 8, 887-900, 2008.

Saiz-Lopez, A., Fernandez, R. P., Ordóñez, C., Kinnison, D. E., Gómez Martín, J. C., Lamarque, J. F., and Tilmes, S.: Iodine chemistry in the troposphere and its effect on ozone, *Atmos. Chem. Phys.*, 14, 13119-13143, 10.5194/acp-14-13119-2014, 2014.

Sander, R.: Compilation of Henry's Law Constants for Inorganic and Organic Species of Potential Importance in Environmental Chemistry (v3), available at: <http://www.henrys-law.org/> (last access: 1 Sept 2016), 1999.

Sander, S. P., Friedl, R. R., Golden, D. M., Kurylo, M. J., Moortgat, G. K., Wine, P. H., Ravishankara, A. R., Kolb, C. E., Molina, M. J., Diego, S., Jolla, L., Huie, R. E., and Orkin, V. L.: Chemical Kinetics and Photochemical Data for Use in Atmospheric Studies Evaluation Number 15, JPL\_NASA, 06-2, Jet Propulsion Laboratory, Pasadena, CA, 2006.

Sander, S. P., Friedl, R. R., Barker, J. R., Golden, D. M., Kurylo, M. J., Sciences, G. E., Wine, P. H., Abbatt, J. P. D., Burkholder, J. B., Kolb, C. E., Moortgat, G. K., Huie, R. E., and Orkin, V. L.: Chemical Kinetics and Photochemical Data for Use in Atmospheric Studies, Evaluation No. 17, JPL\_NASA, 10-6, Jet Propulsion Laboratory, Pasadena, CA, 2011.
